# Supplementary material for: Foliar Selenate and Zinc Oxide Separately Applied to Two Pea Varieties: Effects on Growth Parameters and Accumulation of Minerals and Macronutrients in Seeds under Field Conditions
Source: MDPI journal article supplement (doi:10.3390/foods12061286), 2023-03-17
Supplement: s1 [file s1]

### Online Supplementary Information

**Table S1.** Correlation analysis between Se/Zn application dose and seed Se/Zn concentration in the studied pea varieties.

| Treatment | Variety    | Regression Equation     | r <sup>2</sup> | p-Value |
|-----------|------------|-------------------------|----------------|---------|
| Se        | Ambassador | $y = 0.0385x + 0.0907$  | 0.999          | 0.004   |
|           | Premium    | $y = 0.0318x + 0.0638$  | 0.999          | 0.002   |
| Zn        | Ambassador | $y = -0.0093x + 43.953$ | 0.999          | 0.019   |
|           | Premium    | $y = 0.0057x + 32.016$  | 0.722          | 0.354   |
